# Supplementary material
Source: Springer Nature journal article supplement (https://www.springermedizin.de/resource/supplementary/12936_2005_155_MOESM3_ESM.pdf/9547010)

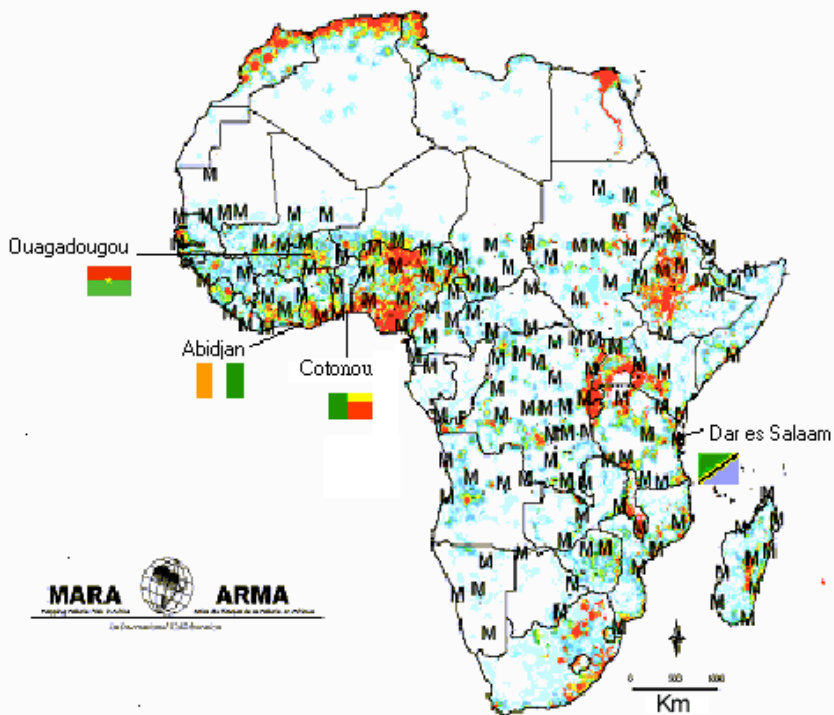

Major urban ares (=M)

Supplement: MOESM3 [file 9547010]
